# Supplementary material for: The translationally controlled tumor protein TCTP is involved in cell cycle progression and heat stress response in the bloodstream form of Trypanosoma brucei
Source: PubMed Central journal article supplement (PMC6206406; doi:10.15698/mic2018.10.652), 2018-08-24
Supplement: mic-05-460-s01.pdf [file mic-05-460-s01.pdf]

1 **Supplementary information**

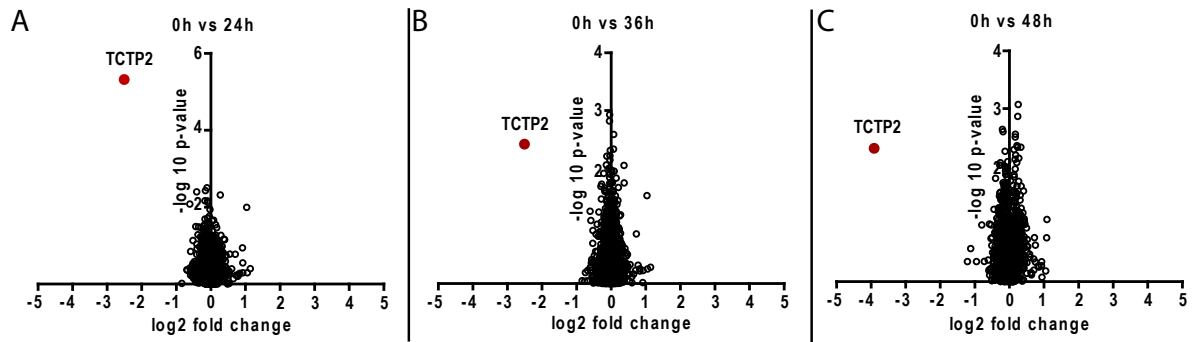

4

5 **Figure S1** Volcano plots showing log<sub>2</sub> fold changes of protein abundances following TCTP RNAi in

6 bloodstream trypanosomes. The proteomes of non-induced cells were compared with the ones where

7 downregulation of TCTP was induced for (A) 24 hours, (B) 36 hours (C) or 48 hours. For each time

8 point measurements were done in triplicates. p-values were calculated using two tailed student's t-test.

9

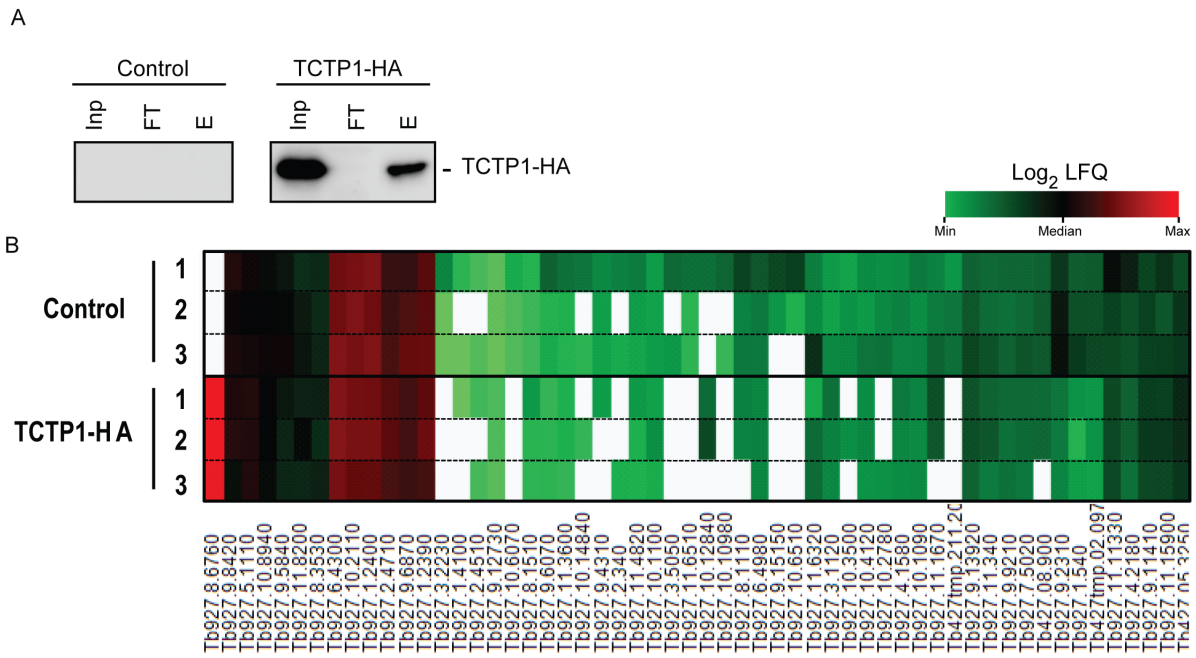

22

23 **Figure S2** Co-immunoprecipitation of TCTP1-HA in procyclic trypanosomes. (A) Lysate of procyclic  
 24 trypanosomes in which TCTP1 was c-terminally tagged with HA was incubated with anti-HA  
 25 conjugated magnetic beads. Input (inp), flowthrough (FT) and eluate (E) were analyzed by Western  
 26 blot decorated with anti-HA antibody. Equivalent cell numbers were loaded in each lane. Non-tagged  
 27 procyclic 29-13 were used as control for specificity. (B) Table showing mass spectrometry analysis  
 28 results of TCTP bound anti-HA conjugated beads. Color coded are displayed the log<sub>2</sub> label-free  
 29 quantifiers (LFQ) calculated by MaxQuant on protein intensity. Color code is relative to the highest  
 30 and lowest log<sub>2</sub> transformed LFQ value with brightest red being the maximum, brightest green the  
 31 minimum, black the median. In white are missing values.

32

33

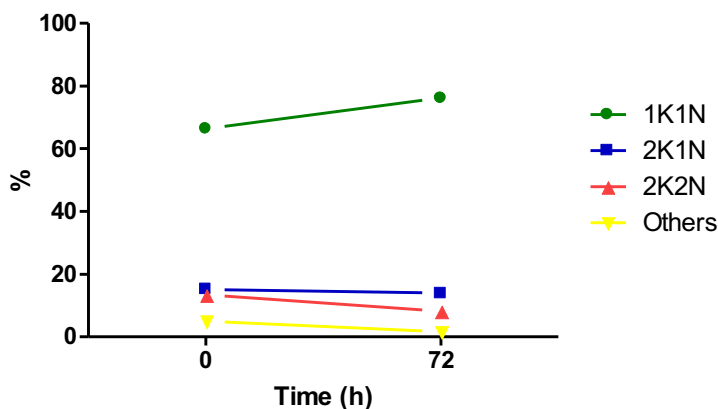

34

35 **Figure S3** DNA content analysis following TCTP ORF RNAi in BSF cells (n ≥ 100). Two timepoints  
 36 are shown 0 and 72h post RNAi induction. 1K1N, cells with one kinetoplast and one nucleus.
